# Supplementary material
Source: publisher figshare collection journal article supplement (https://frontiersin.figshare.com/ndownloader/files/22692245)
Supplement: Supplementary file 1 [file 22692245]

## Sheet: Foglio1
Character	C. etruscus	C. arnensis	C. apolloniensis	C. mosbachensis	Canis sp. from Dmanisi
Nasal bones, in dorsal view	very long, end well beyond maxillo-frontal suture	short, end slightly before the levelof maxillo-frontal suture	-	long, end beyond maxillo-frontal suture	Long, end beyond maxillo-frontal suture	1, 2
Nasal bones, in lateral view	straight profile in lateral view	gently dorsoventrally curved	-	dorsoventrally curved	slightly dorsoventrally curved	2
Distal elongation of the postorbital constriction	modest	reduced	-	generally marked	modest
Outline of nuchal crest	blunt dorsal outline	rounded outline	-	triangular, sharp-pointed	blunt dorsal outline
Medial walls of the tympanic bullae	straight, parallel one another	straight, parallel one another	-	markedly rostrocaudally divergent	markedly rostrocaudally divergent	2, here
GWOC/AB	> 0.9	< 0.9	-	< 0.9	< 0.9	3
Axis of P3	inline with that of P4	inline with that of P4	generally deviates laterally from that of P4	generally deviates laterally from that of P4	may deviates laterally from that of P4	4
M1 pararcone	larger than the metacone	slightly larger than the metacone	larger than the metacone	larger than the metacone	larger than the metacone	1, 5
Trigon-talon basins on M1	same depth	same depth	trigon basin deeper	trigon basin deeper	trigon basin deeper	1, 2
Occlusal shape of the M2	squared	short bean-like shape	generally buccolingually elongated bean-shaped	buccolingually elongated bean-shaped	generally triangular	1
M2 metacone	smaller than the paracone	equal-sized with paracone	similar to the paracone	smaller than paracone	smaller than paracone
Contact between M1-M2	reduced	broad	reduced	reduced	reduced	3
Toothrow curvature	strong	slight	tend to be strong	tend to be strong	strong	6
Lower premolars protoconids	high	high	short	short	short	2
p3 alveolus	at same level of p2-p4 alveoli	at same level of p2-p4 alveoli	at same level of p2-p4 alveoli	lower in the mandible, especially distally	lower in the mandible, especially distally	1
p3 distal accessory cuspulid	developed	developed	generally reduced	generally reduced	present
p4 secondary distal cuspulid and distal cingulid	separated	separated	fused	fused	fused
Mesial margin of paraconid of m1	vertical and straight	vertical and straight	inclined distally and straight/slightly curved	inclined distally and straight/slightly curved	inclined distally and straight	2
Hypoconid of m1	very large	similar size with entoconid	considerably larger than entoconid	larger than entoconid	larger than entoconid	1, 7
Transverse cristid	straight (rarely sinuous)	straight	straight (rarely sinuous)	generally sinuous	generally sinous	1, 2
m1 accessory cuspids	absent	can be present	generally present	generally present	can be present	2, 8
m2 protoconid	larger than the metaconid	equal-sized with metaconid	larger than the metaconid	larger than the metaconid	larger than the metaconid	5
m2 distolingual cuspids	absent	entoconid evident	gnerally absent	gnerally absent	absent	5, 8
